# Supplementary figures and images for: Genetic Estimates for Growth and Shape-Related Traits in the Flatfish Senegalese Sole
Source: MDPI journal article supplement (doi:10.3390/ani11051206), 2021-04-22

A)

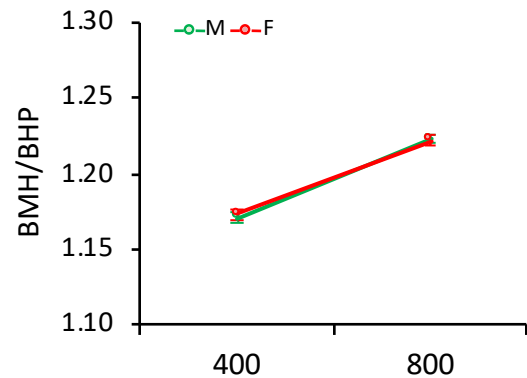

B)

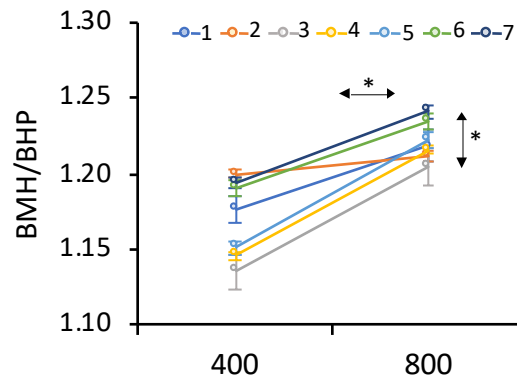

C)

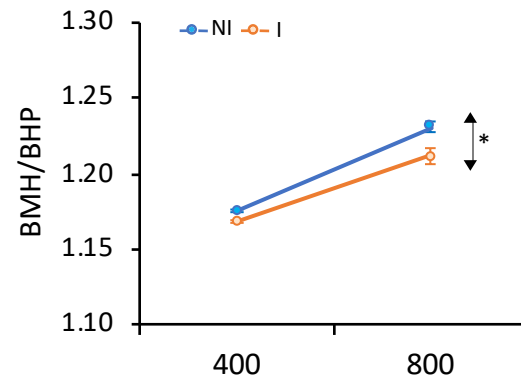

A)

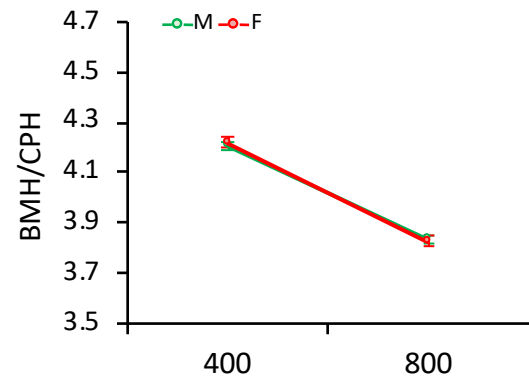

B)

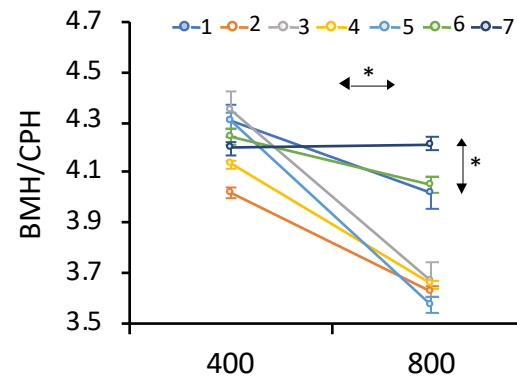

C)

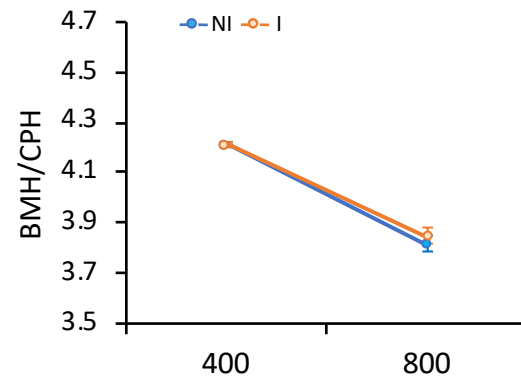

Supplement: s1 [file s1]

A) 400 d

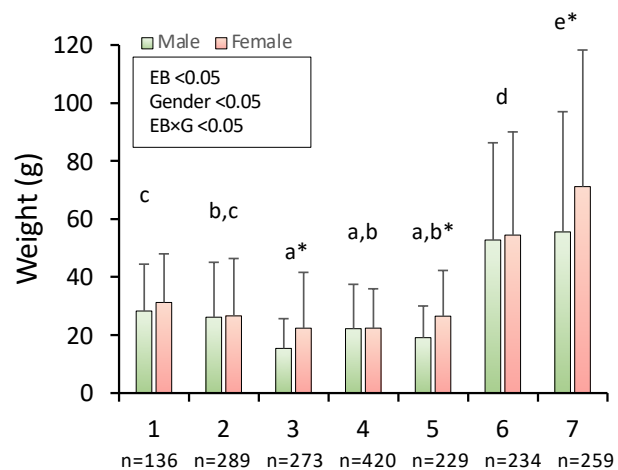

B) 800 d

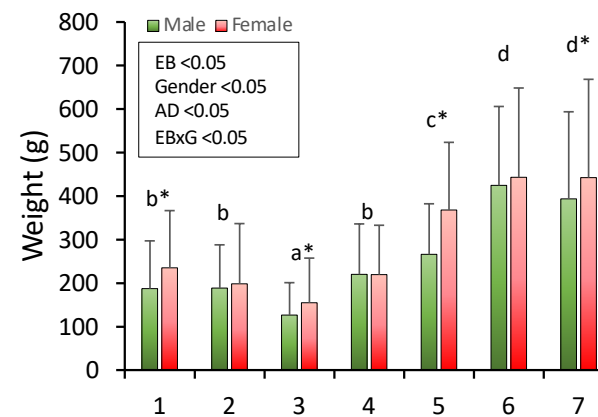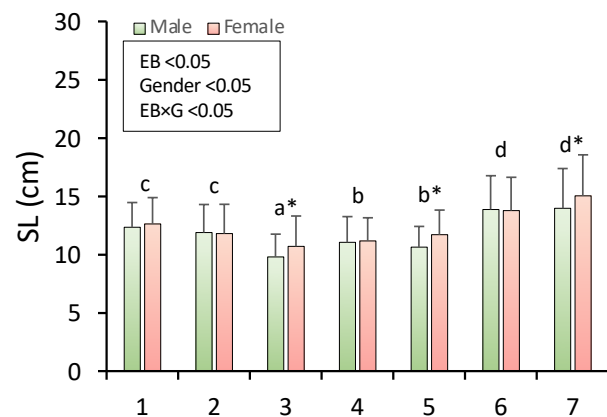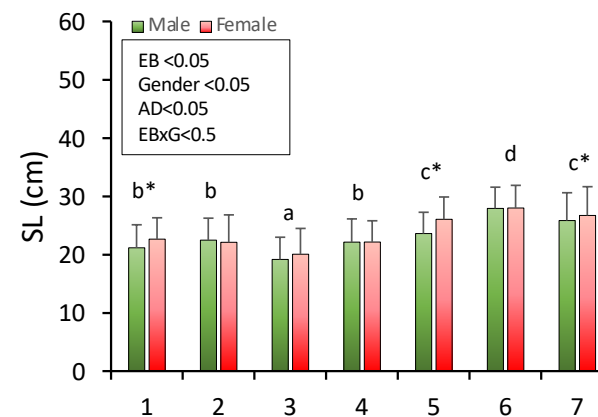

A) 400 d

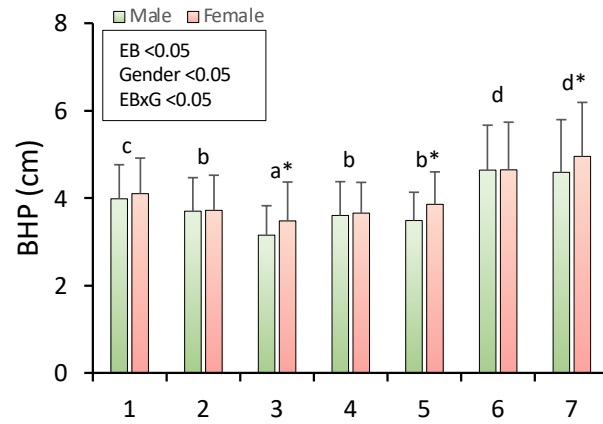

B) 800 d

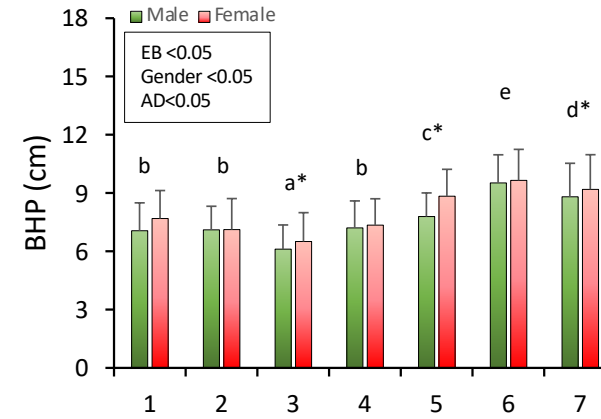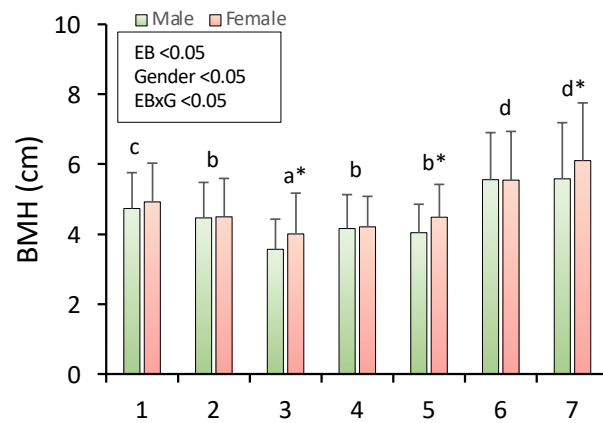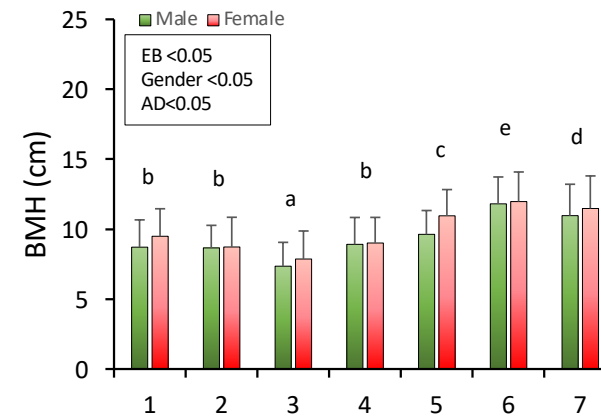

A) 400 d

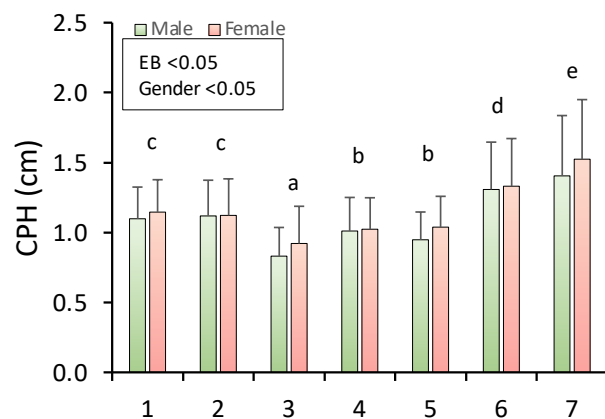

B) 800 d

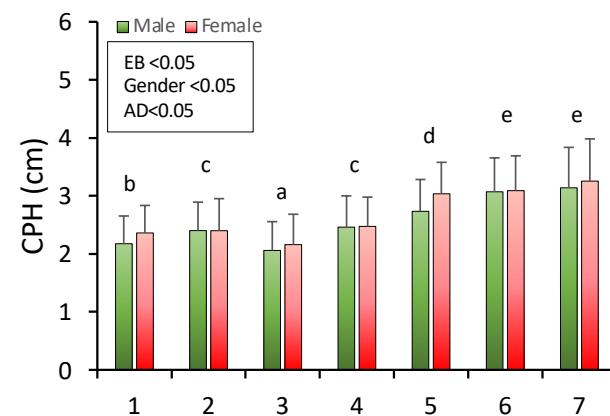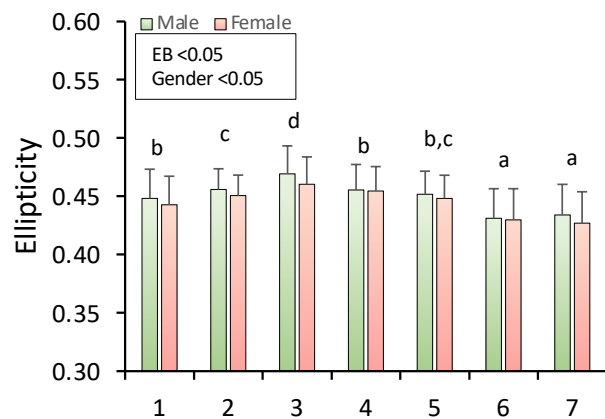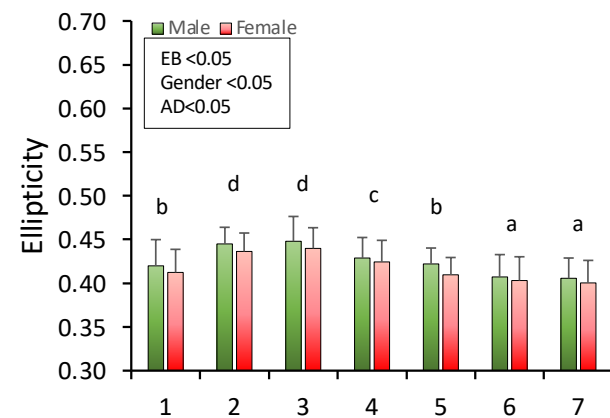

A) 400 d

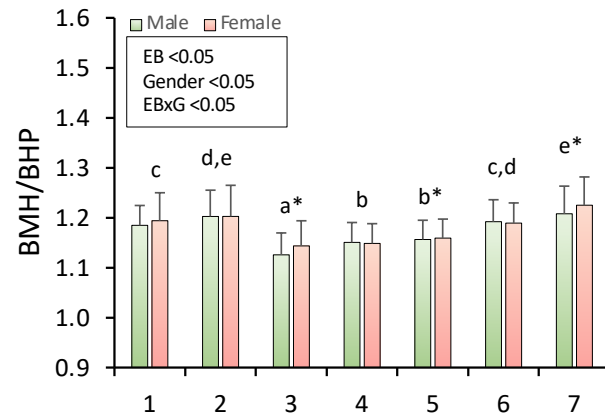

B) 800 d

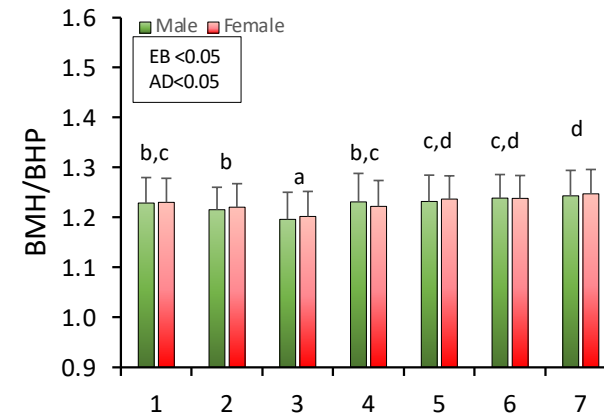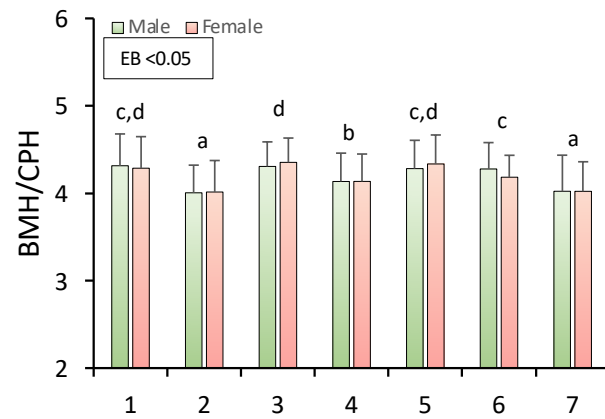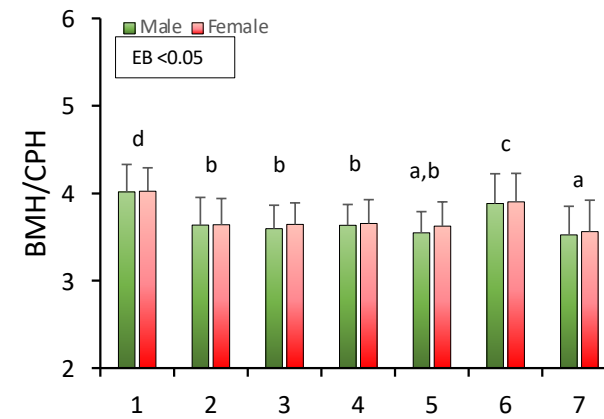

Supplement: s1 [file s1]

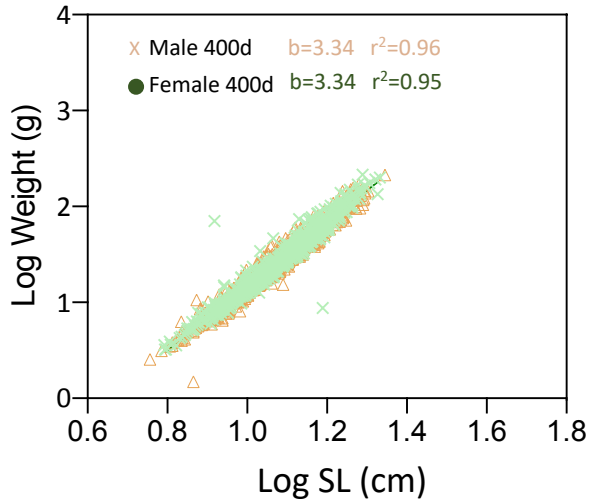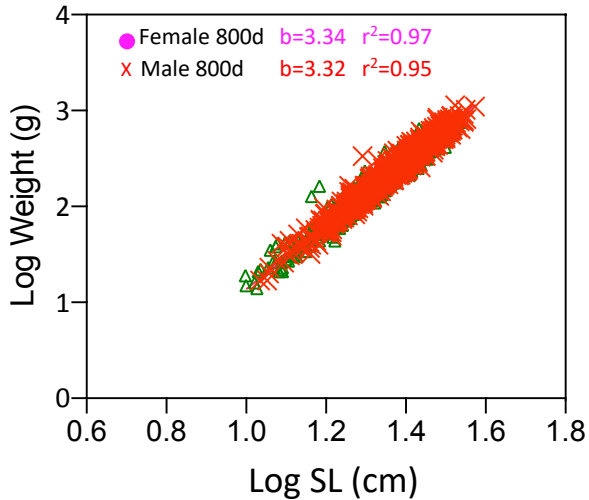

Supplement: s1 [file s1]

A)

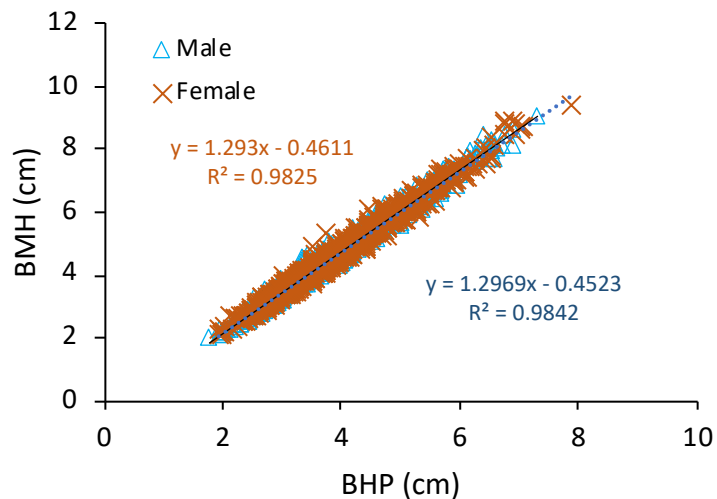

B)

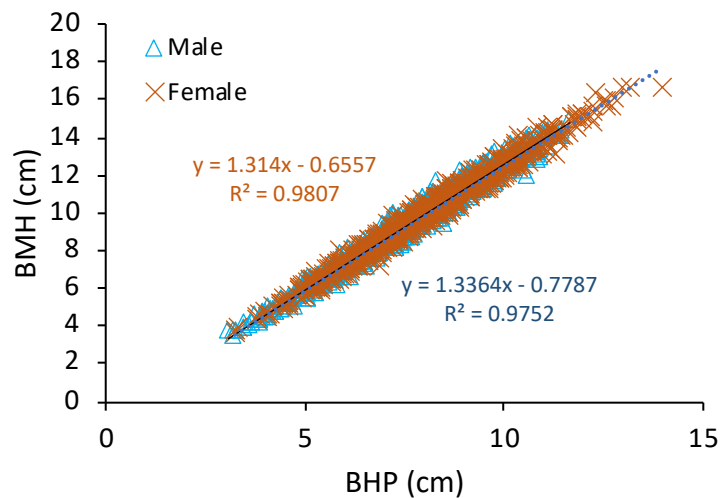

C)

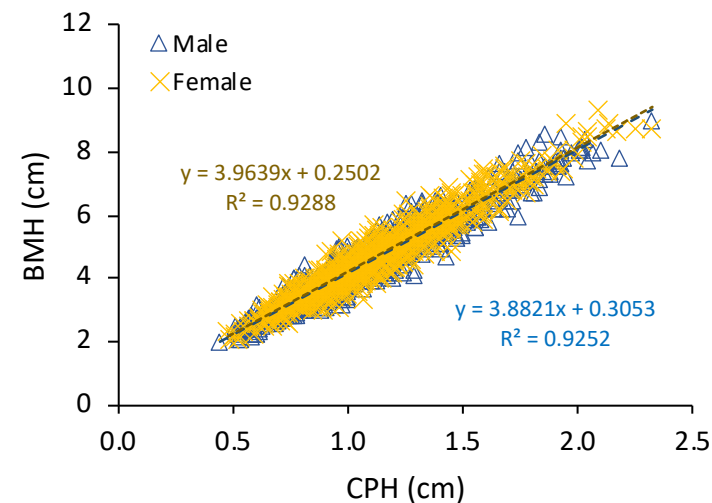

D)

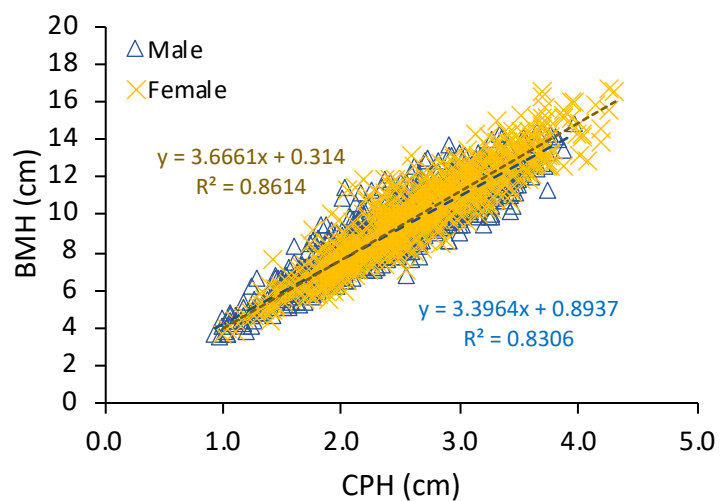

Supplement: s1 [file s1]

A)

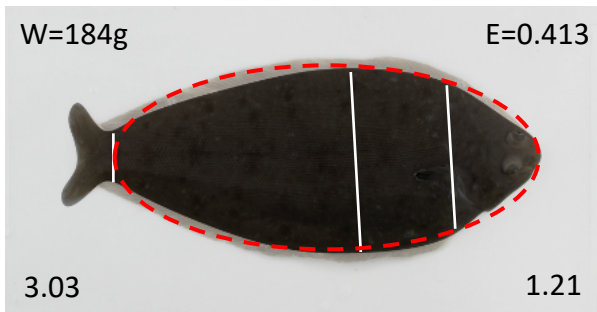

B)

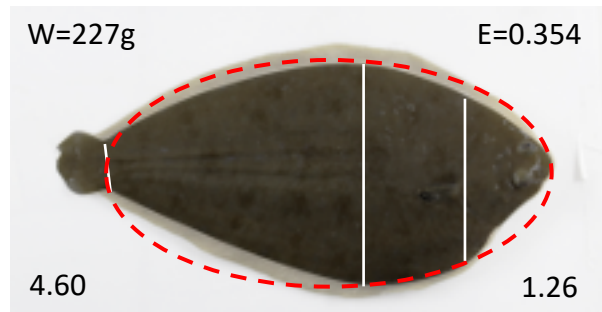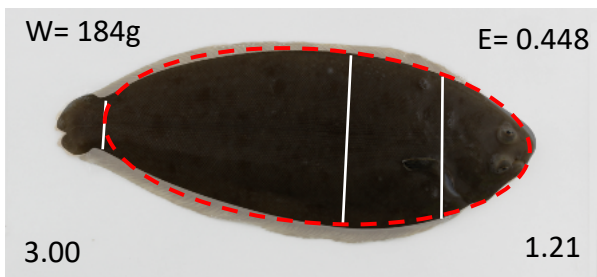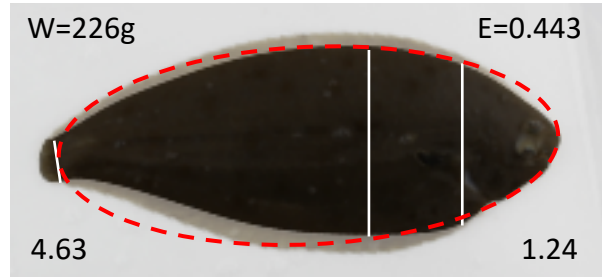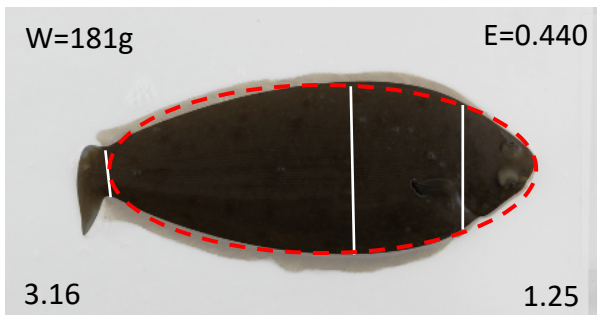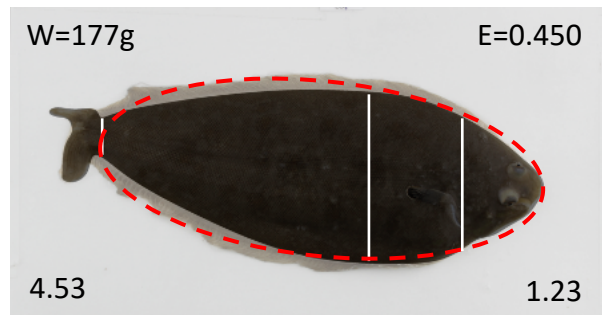

Supplement: s1 [file s1]
